# Supplementary material for: Large-scale impacts of sea star wasting disease (SSWD) on intertidal sea stars and implications for recovery
Source: PubMed Central journal article supplement (PMC5860697; doi:10.1371/journal.pone.0192870), 2018-03-20

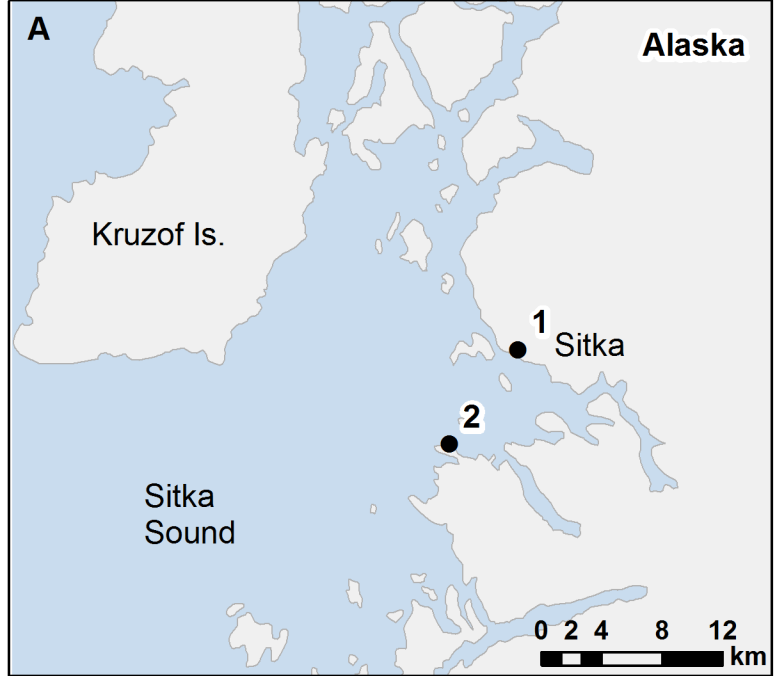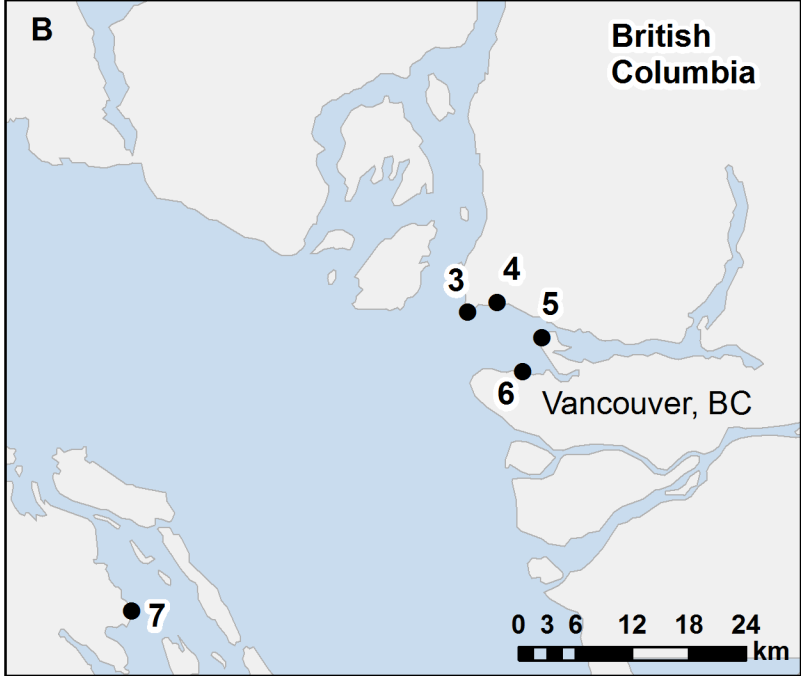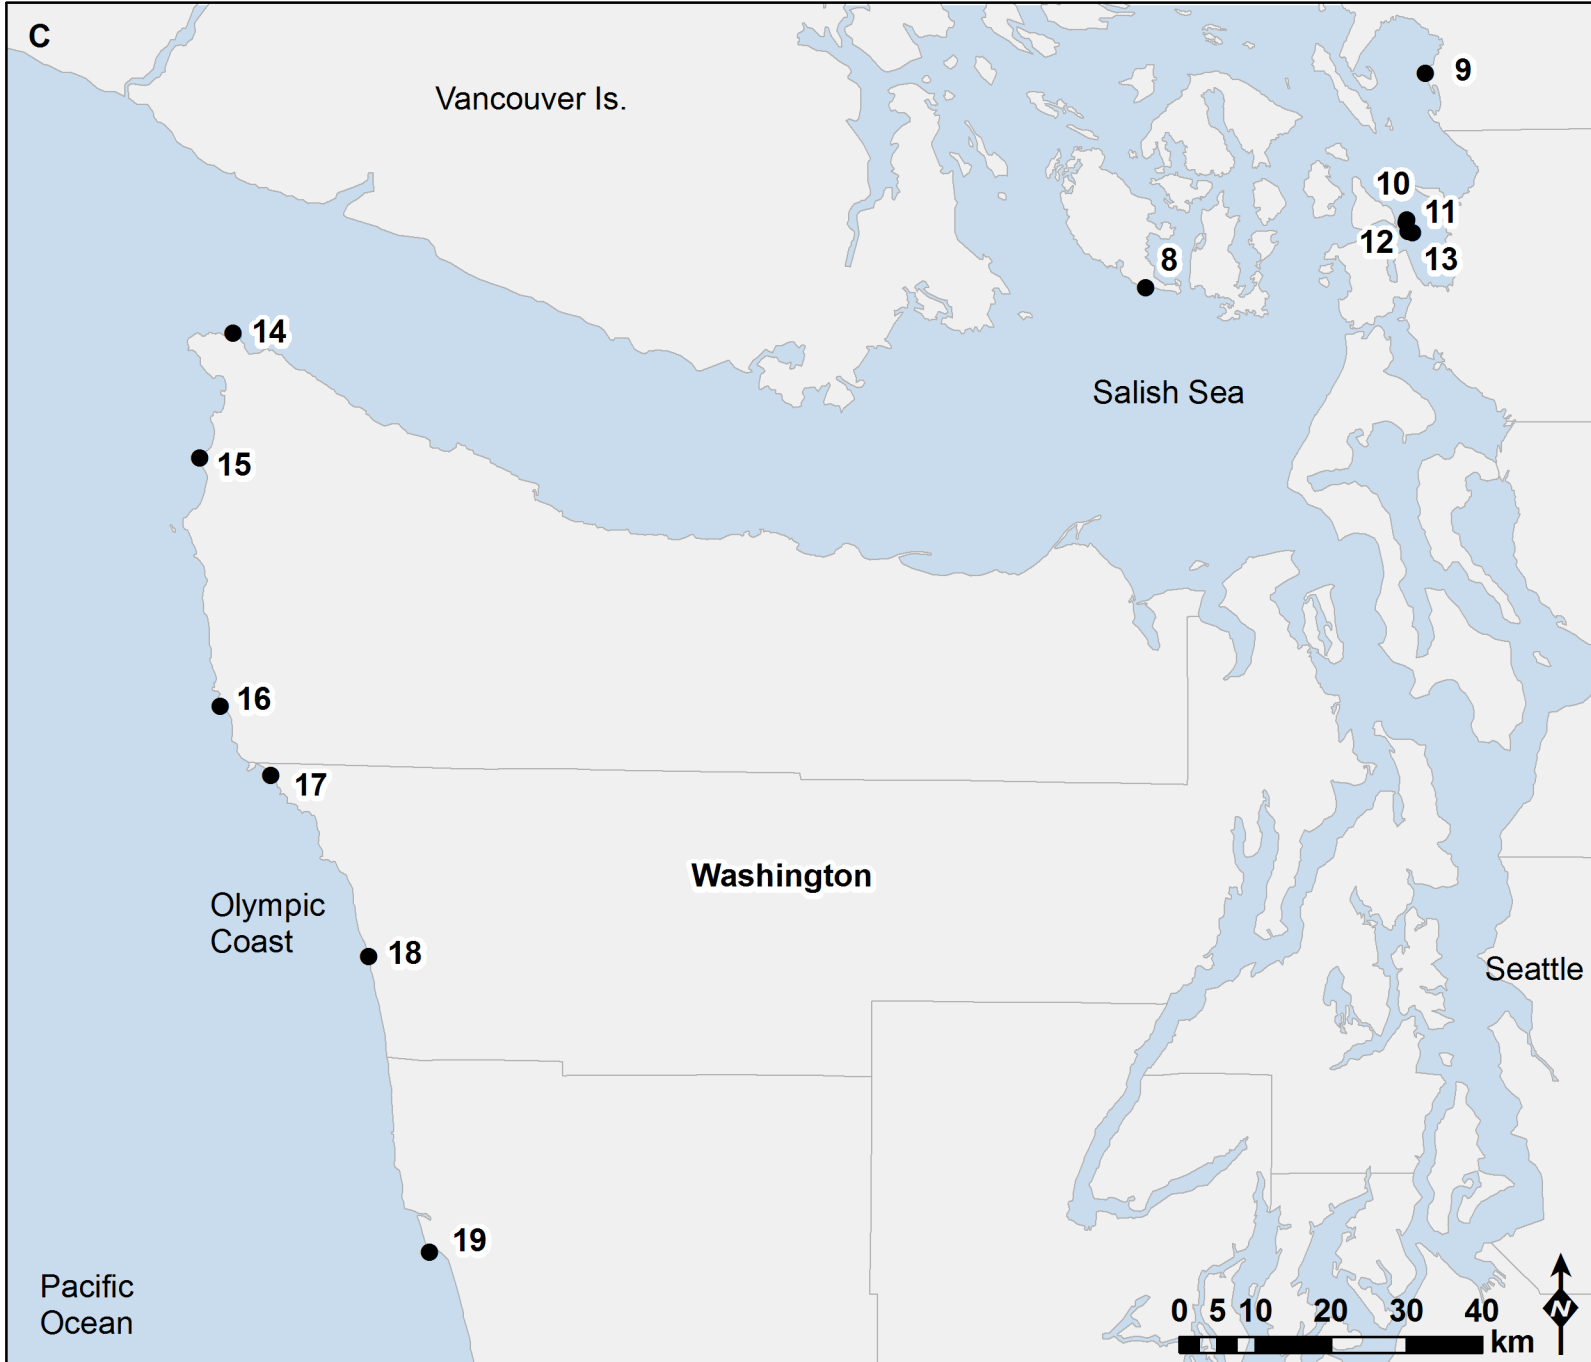

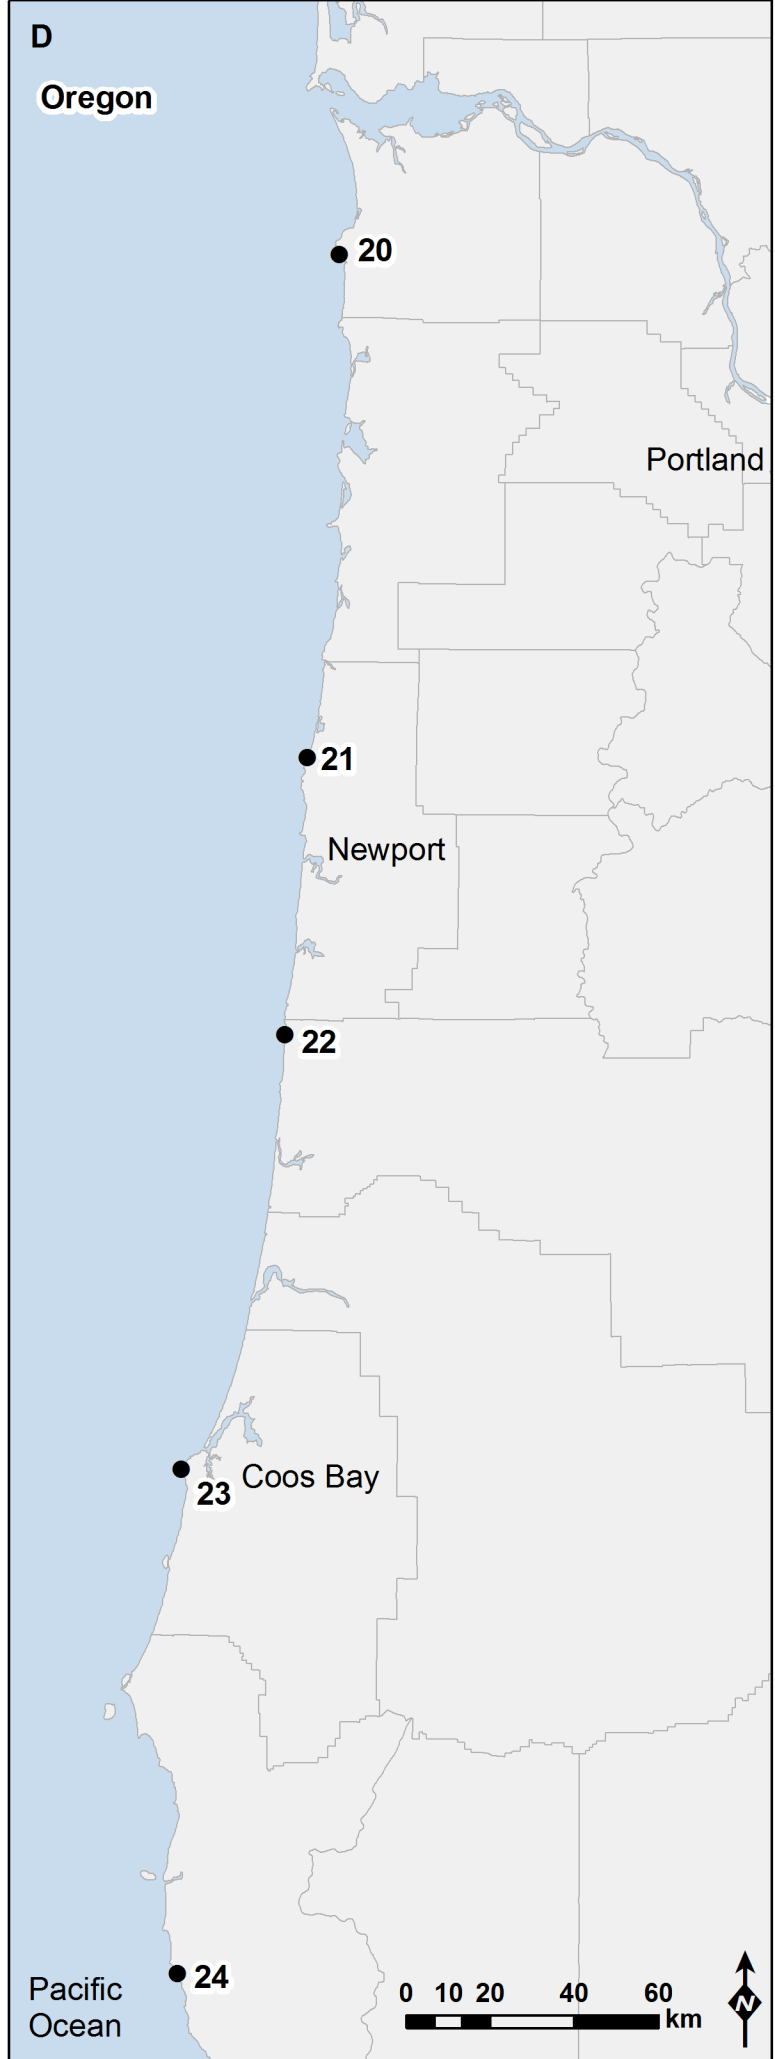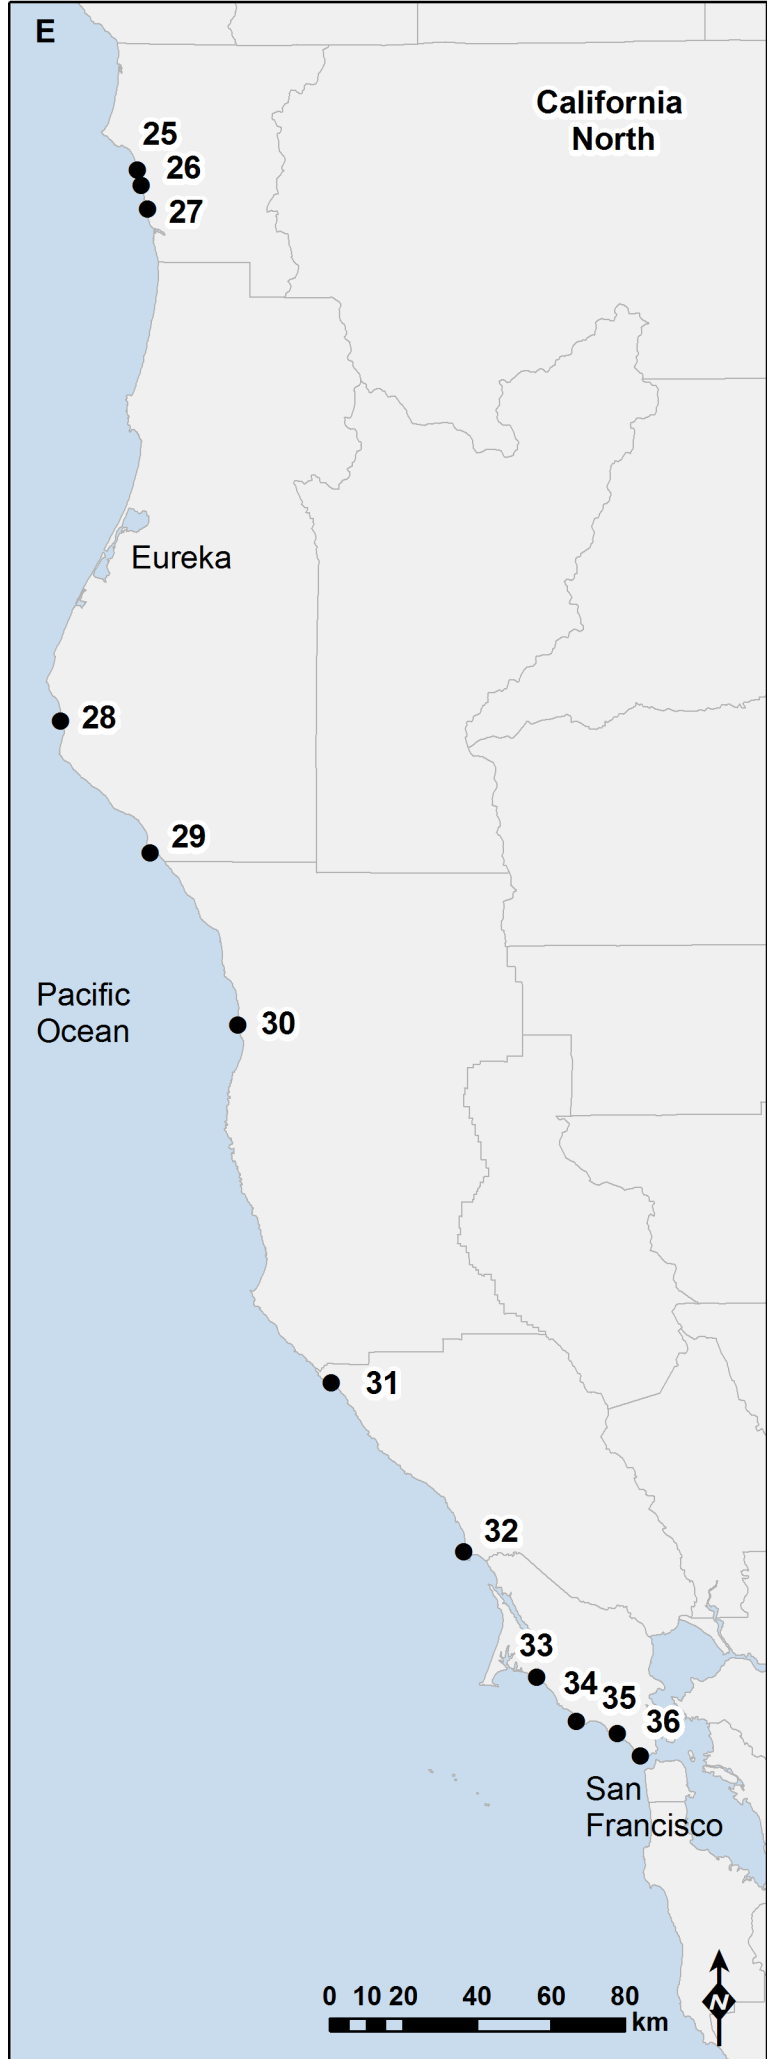

F

California  
Central

37

San  
Francisco  
Bay

38

39

Monterey  
Bay

40

41

42

43

44

45

46

47

48

49

50

51

Santa Barbara

Pacific Ocean

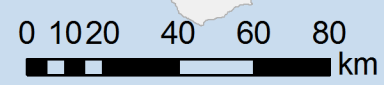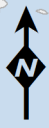

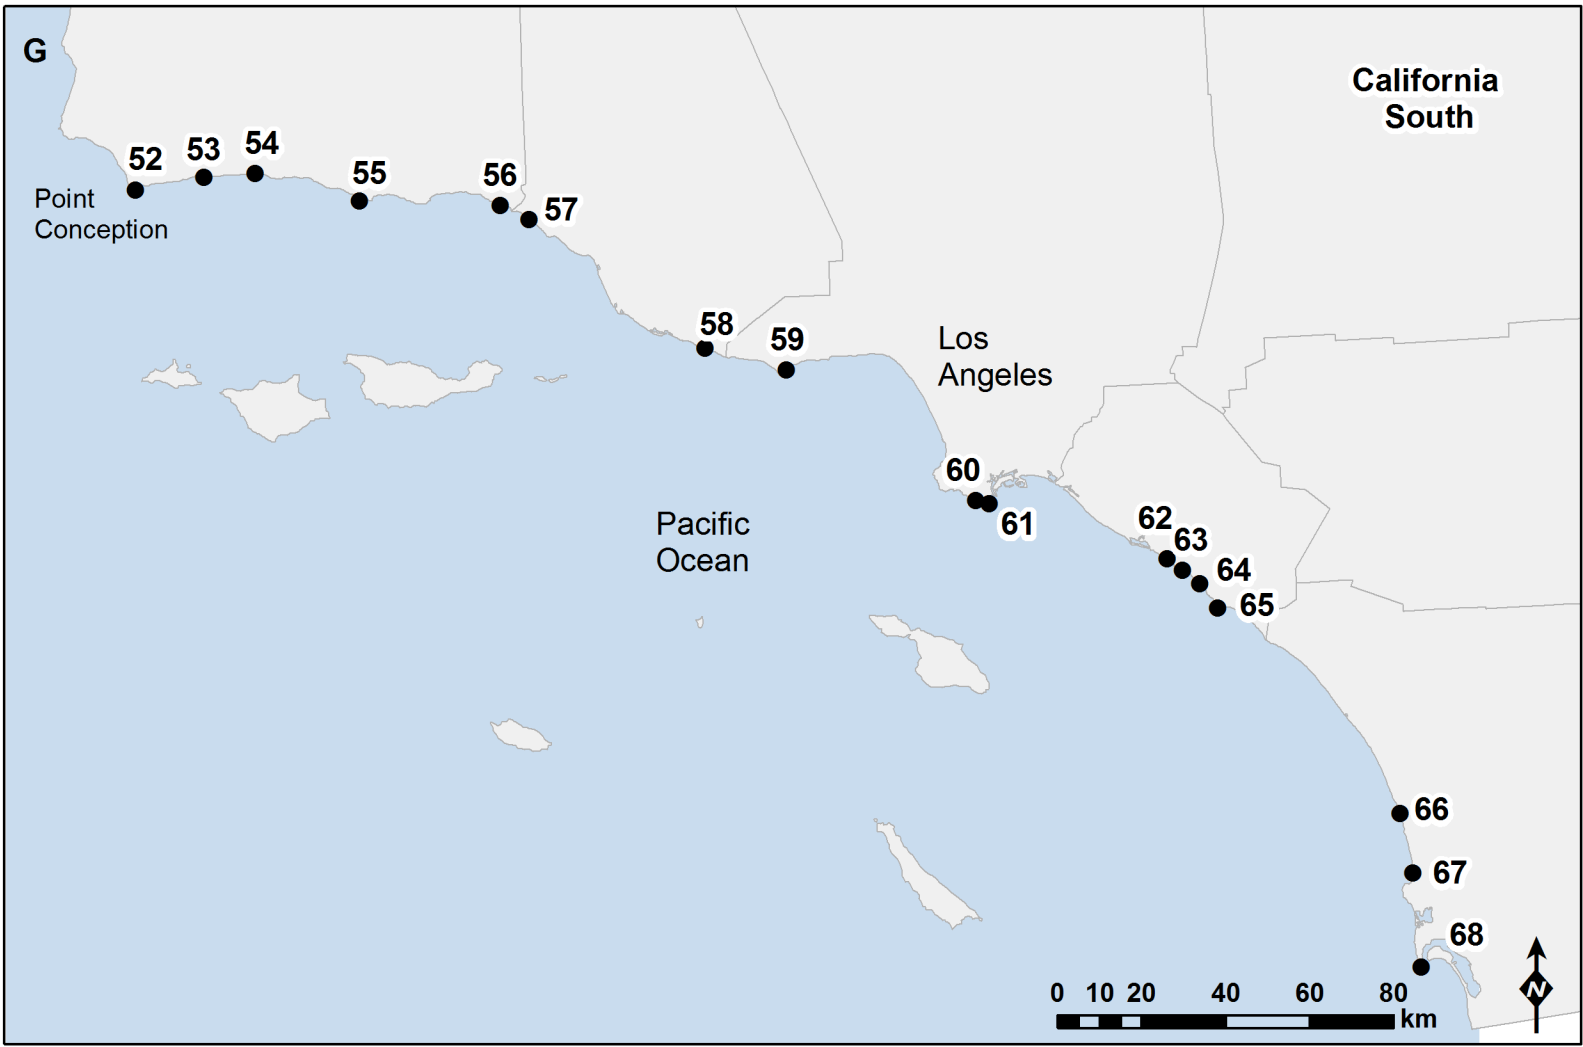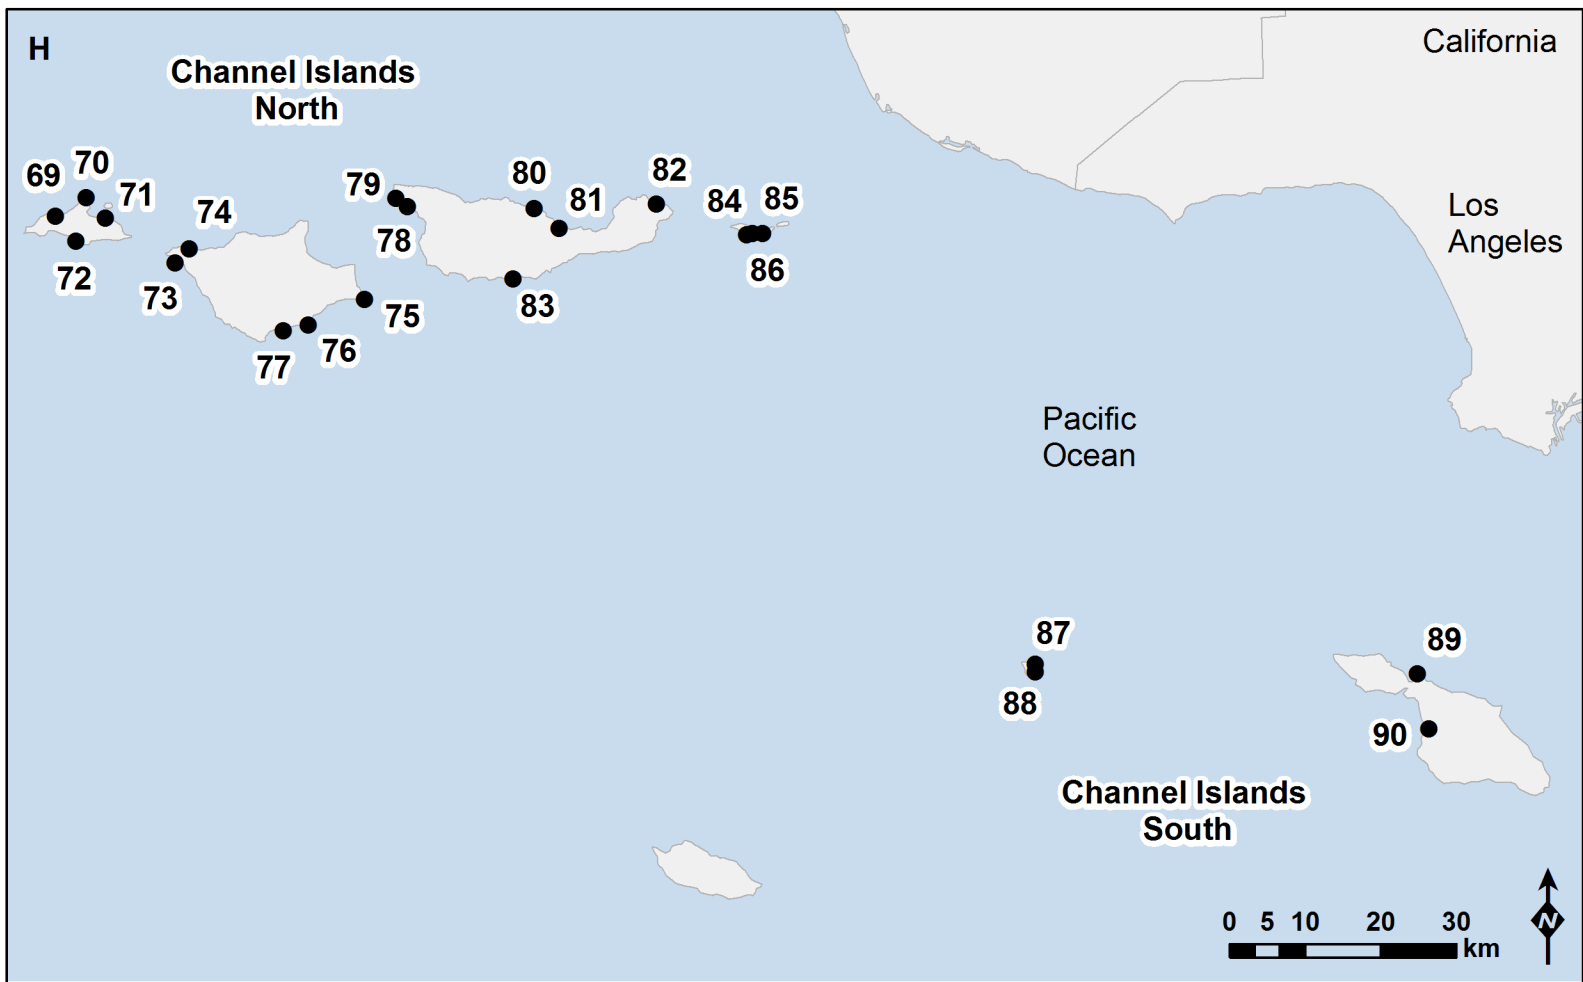

Supplement: pone.0192870.s001.pdf [file pone.0192870.s001.pdf]
