# Supplementary material for: Large-scale impacts of sea star wasting disease (SSWD) on intertidal sea stars and implications for recovery
Source: PubMed Central journal article supplement (PMC5860697; doi:10.1371/journal.pone.0192870), 2018-03-20
Supplement: pone.0192870.s003.pdf [file pone.0192870.s003.pdf]

| Site No. | Geo Region       | Site Name              | Latitude | Longitude | Monitoring Group | Pre-2013 Density Data |
|----------|------------------|------------------------|----------|-----------|------------------|-----------------------|
| 1        | AK               | Sage Rock              | 57.0487  | -135.3231 | SSSC/UCSC        | x                     |
| 2        | AK               | Pirates Cove           | 56.98661 | -135.3776 | SSSC/UCSC        | x                     |
| 3        | BC               | Point Atkinson         | 49.3302  | -123.2652 | UBC              | x                     |
| 4        | BC               | W. Vancouver Rope Site | 49.3392  | -123.2228 | UBC              | x                     |
| 5        | BC               | Ferguson Point         | 49.306   | -123.1568 | UBC              | x                     |
| 6        | BC               | Dunbar                 | 49.2734  | -123.1847 | UBC              | x                     |
| 7        | BC               | Yellow Point           | 49.0431  | -123.7509 | UBC              | x                     |
| 8        | WA Salish Sea    | American Camp          | 48.45731 | -123.0222 | ONP              |                       |
| 9        | WA Salish Sea    | Post Point             | 48.712   | -122.5191 | UCSC             |                       |
| 10       | WA Salish Sea    | Saddlebag North Cove   | 48.5371  | -122.5547 | PBNERR           |                       |
| 11       | WA Salish Sea    | Saddlebag South East   | 48.5343  | -122.5549 | PBNERR           |                       |
| 12       | WA Salish Sea    | Hat Island West        | 48.52353 | -122.5522 | PBNERR           |                       |
| 13       | WA Salish Sea    | Hat Island East        | 48.52221 | -122.5435 | PBNERR           |                       |
| 14       | WA Olympic Coast | Kydikabbit Point       | 48.39147 | -124.6537 | OCNMS            |                       |
| 15       | WA Olympic Coast | Point of the Arches    | 48.242   | -124.7078 | ONP              |                       |
| 16       | WA Olympic Coast | Sokol Point            | 47.94709 | -124.6623 | ONP              | x                     |
| 17       | WA Olympic Coast | Taylor Point           | 47.86602 | -124.57   | ONP              | x                     |
| 18       | WA Olympic Coast | Starfish Point         | 47.6527  | -124.3905 | ONP              | x                     |
| 19       | WA Olympic Coast | Point Grenville        | 47.30255 | -124.2753 | OCNMS            |                       |
| 20       | OR               | Ecola                  | 45.91809 | -123.9803 | ONP/UCSC         | x                     |
| 21       | OR               | Fogarty Creek          | 44.83864 | -124.0588 | UCSC             | x                     |
| 22       | OR               | Bob Creek              | 44.24456 | -124.1144 | UCSC             | x                     |
| 23       | OR               | Cape Arago             | 43.30894 | -124.4008 | UCSC             | x                     |
| 24       | OR               | Burnt Hill             | 42.22814 | -124.3879 | UCSC             | x                     |
| 25       | CA North         | Enderts                | 41.69    | -124.1426 | RNSP             |                       |
| 26       | CA North         | Damnation Creek        | 41.65249 | -124.1278 | RNSP             | x                     |
| 27       | CA North         | False Klamath Cove     | 41.59476 | -124.1064 | RNSP             |                       |
| 28       | CA North         | Cape Mendocino         | 40.341   | -124.3632 | UCSC             | x                     |
| 29       | CA North         | Shelter Cove           | 40.02254 | -124.0737 | UCSC             | x                     |
| 30       | CA North         | Kibesillah Hill        | 39.60412 | -123.7889 | UCSC             | x                     |
| 31       | CA North         | Sea Ranch              | 38.7305  | -123.4886 | UCSC             | x                     |
| 32       | CA North         | Bodega                 | 38.3182  | -123.0737 | UCSC             | x                     |
| 33       | CA North         | Santa Maria Creek      | 38.01243 | -122.8491 | PORE             | x                     |
| 34       | CA North         | Bolinas Point          | 37.90354 | -122.7272 | PORE             | x                     |
| 35       | CA North         | Slide Ranch            | 37.87406 | -122.6009 | GOGA             |                       |
| 36       | CA North         | Point Bonita           | 37.81911 | -122.5293 | GOGA             |                       |
| 37       | CA Central       | Alcatraz               | 37.825   | -122.4219 | GOGA             | x                     |
| 38       | CA Central       | Scott Creek            | 37.04425 | -122.2349 | UCSC             | x                     |
| 39       | CA Central       | Terrace Point          | 36.94841 | -122.0646 | UCSC             | x                     |
| 40       | CA Central       | Hopkins                | 36.6212  | -121.9073 | UCSC             | x                     |
| 41       | CA Central       | Stillwater             | 36.56087 | -121.9405 | UCSC             | x                     |
| 42       | CA Central       | Point Lobos            | 36.51366 | -121.9469 | UCSC             | x                     |
| 43       | CA Central       | Andrew Molera          | 36.28061 | -121.8632 | UCSC             | x                     |
| 44       | CA Central       | Mill Creek             | 35.97965 | -121.4903 | UCSC             | x                     |
| 45       | CA Central       | Point Sierra Nevada    | 35.72883 | -121.3187 | UCSC             | x                     |

|    |                      |                   |            |            |          |   |
|----|----------------------|-------------------|------------|------------|----------|---|
| 46 | CA Central           | Cayucos           | 35.44739   | -120.9498  | UCSC     | x |
| 47 | CA Central           | Hazards           | 35.28966   | -120.8833  | UCSC     | x |
| 48 | CA Central           | Shell Beach       | 35.16881   | -120.6967  | UCSC     | x |
| 49 | CA Central           | Occulto           | 34.88122   | -120.6395  | UCSC     |   |
| 50 | CA Central           | Stairs            | 34.73038   | -120.6155  | UCSC     | x |
| 51 | CA Central           | Boat House        | 34.55388   | -120.6117  | UCSC     | x |
| 52 | CA South             | Government Point  | 34.44334   | -120.4565  | UCSC     | x |
| 53 | CA South             | Alegria           | 34.46714   | -120.2774  | UCLA     | x |
| 54 | CA South             | Arroyo Hondo      | 34.47344   | -120.1454  | UCLA     | x |
| 55 | CA South             | Coal Oil Point    | 34.40693   | -119.878   | UCLA     | x |
| 56 | CA South             | Carpinteria       | 34.38703   | -119.5141  | UCLA     | x |
| 57 | CA South             | Mussel Shoals     | 34.35548   | -119.4407  | UCLA     | x |
| 58 | CA South             | Old Stairs        | 34.06612   | -118.9978  | UCLA     | x |
| 59 | CA South             | Paradise Cove     | 34.01201   | -118.7922  | UCLA     | x |
| 60 | CA South             | White Point       | 33.71539   | -118.3196  | UCLA     | x |
| 61 | CA South             | Point Fermin      | 33.70679   | -118.286   | UCLA     | x |
| 62 | CA South             | Crystal Cove      | 33.57078   | -117.8377  | CSUF/CPP | x |
| 63 | CA South             | Shaws Cove        | 33.54477   | -117.7994  | CSUF/CPP | x |
| 64 | CA South             | Treasure Island   | 33.51335   | -117.7579  | CSUF/CPP |   |
| 65 | CA South             | Dana Point        | 33.4599    | -117.7147  | CSUF/CPP | x |
| 66 | CA South             | Cardiff Reef      | 32.9998398 | -117.27867 | CABR     | x |
| 67 | CA South             | Scripps Reef      | 32.8716507 | -117.25328 | CABR     | x |
| 68 | CA South             | Cabrillo I        | 32.6694717 | -117.2455  | CABR     | x |
| 69 | CA Channel Is. North | Otter Harbor      | 34.05203   | -120.4076  | CHIS     |   |
| 70 | CA Channel Is. North | Harris Point      | 34.07337   | -120.3632  | CHIS     |   |
| 71 | CA Channel Is. North | Cuyler Harbor     | 34.04855   | -120.3364  | CHIS     |   |
| 72 | CA Channel Is. North | Crook Point       | 34.02159   | -120.3789  | CHIS     |   |
| 73 | CA Channel Is. North | Fossil Reef       | 33.99315   | -120.2376  | CHIS     | x |
| 74 | CA Channel Is. North | NW Talcott        | 34.00957   | -120.2176  | CHIS     | x |
| 75 | CA Channel Is. North | East Point        | 33.9427    | -119.968   | CHIS     | x |
| 76 | CA Channel Is. North | Ford Point        | 33.91453   | -120.0502  | CHIS     | x |
| 77 | CA Channel Is. North | Johnsons Lee      | 33.90872   | -120.0863  | CHIS     | x |
| 78 | CA Channel Is. North | Trailer           | 34.05187   | -119.9032  | CHIS     | x |
| 79 | CA Channel Is. North | Fraser Cove       | 34.06265   | -119.9192  | CHIS     | x |
| 80 | CA Channel Is. North | Orizaba Cove      | 34.04508   | -119.7219  | CHIS     |   |
| 81 | CA Channel Is. North | Prisoners Harbor  | 34.02038   | -119.6867  | CHIS     | x |
| 82 | CA Channel Is. North | Scorpion Rock     | 34.04552   | -119.5469  | CHIS     |   |
| 83 | CA Channel Is. North | Willows Anchorage | 33.96183   | -119.7549  | CHIS     | x |
| 84 | CA Channel Is. North | Cat Rock          | 34.00557   | -119.4193  | CHIS     | x |
| 85 | CA Channel Is. North | Middle West       | 34.0059    | -119.3965  | CHIS     | x |
| 86 | CA Channel Is. North | S Frenchys Cove   | 34.0066    | -119.4108  | CHIS     | x |
| 87 | CA Channel Is. South | Landing Cove      | 33.48158   | -119.0296  | CHIS     |   |
| 88 | CA Channel Is. South | Sea Lion Rookery  | 33.47201   | -119.0307  | CHIS     | x |
| 89 | CA Channel Is. South | Bird Rock         | 33.45145   | -118.4876  | UCLA     | x |
| 90 | CA Channel Is. South | Little Harbor     | 33.38499   | -118.4752  | UCLA     | x |
